# Supplementary material for: Functional properties of resting state networks in healthy full-term newborns
Source: PubMed Central journal article supplement (PMC4671028; doi:10.1038/srep17755), 2015-12-07
Supplement: srep17755-s1.pdf [file srep17755-s1.pdf]

## **Supplementary Information**

Functional properties of resting state networks in healthy full-term newborns

**Authors:** Josepheen De Asis-Cruz, M.D., Ph.D.<sup>1</sup>, Marine Bouyssi-Kobar, M.S.<sup>1</sup>, Iordanis Evangelou, D.Phil<sup>1</sup>, Gilbert Vezina, M.D.<sup>2</sup>, and Catherine Limperopoulos Ph.D.<sup>1,2,3,\*</sup>

<sup>1</sup> Advanced Pediatric Brain Imaging Research Laboratory, Children's National Health System, Washington, D.C., USA, 20010

<sup>2</sup> Division of Diagnostic Imaging and Radiology, Children's National Health System, Washington, D.C., USA, 20010

<sup>3</sup> Fetal and Transitional Medicine, Children's National Health System, Washington, D.C., USA, 20010

**\* Corresponding author:**

Catherine Limperopoulos, Ph.D.  
Advanced Pediatric Brain Imaging Research Laboratory  
Children's National Health System  
111 Michigan Avenue, NW Washington, D.C 20010  
202 476 5293  
[CLimpero@childrensnational.org](mailto:CLimpero@childrensnational.org)

## **Supplementary figure legends**

**Figure S1. Age distribution of n = 60 neonates.** Gestational ages of neonates (GA) at scan (A) and at birth (B) are shown, along with weeks of life at scan (C). (D) shows GA at scan plotted against GA at birth. Green points in (A) and (B) show distribution of ages within each histogram bin.

**Figure S2. Small-world properties of neonate resting state networks as a function of degree,  $K$ .** Findings are consistent with correlation thresholded networks shown in Figure 1. (A) shows the  $C_{neo}$  (black) and  $C_{random}$  (red).  $C_{neo}$  is significantly greater than  $C_{random}$  at degree range  $42 > K > 6$ ,  $p < 0.01$ , Bonferroni corrected (green asterisks). (B) shows  $L_{neo}$  (black) and  $L_{random}$  (red).  $L_{net}$  and  $L_{random}$  are not different at  $K = 42$  (green triangles). All generated random networks preserve the degree,  $k$ , and degree distribution,  $p(k)$  of the original networks. (C) shows small world index, SWI or  $\sigma$  (light blue).  $SWI > 1$  (99% CI) for all thresholds tested. Also shown are  $\gamma$  (black) and  $\lambda$  (red). Here,  $\gamma \gg 1$  and  $\lambda \geq 1$ . Error bars refer to SEM.

**Figure S3. Right-tailed individual degree distributions.** (A)-(C), left, shows the mean degree distribution for n = 60 neonates (blue) superimposed on individual degree distributions (gray). The histograms on the right panels show the same data as the blue plots on the left.

**Figure S4. Hubs based on degree and betweenness centrality.** Node-specific degree (A) and betweenness (B) values are shown for all 90 ROIs. Red lines mark mean, dashed red lines mark mean  $\pm$  1SD.

**Figure S5. Summary of graph analysis.**

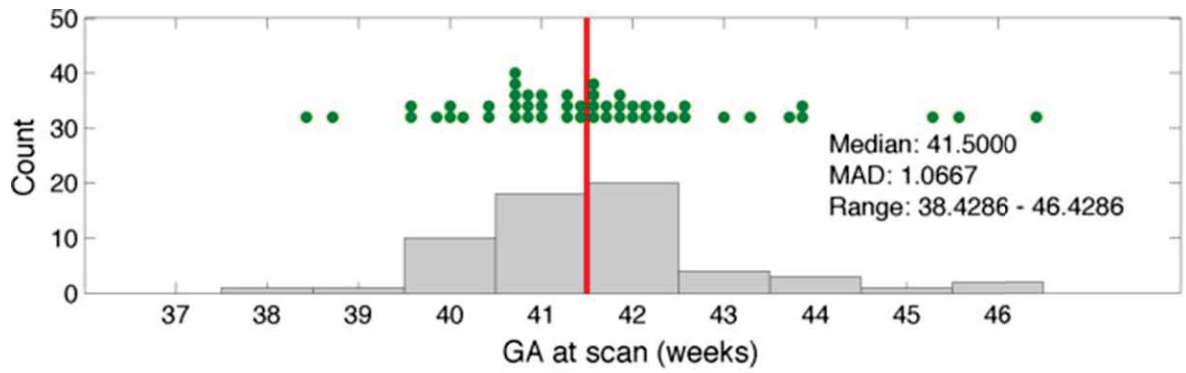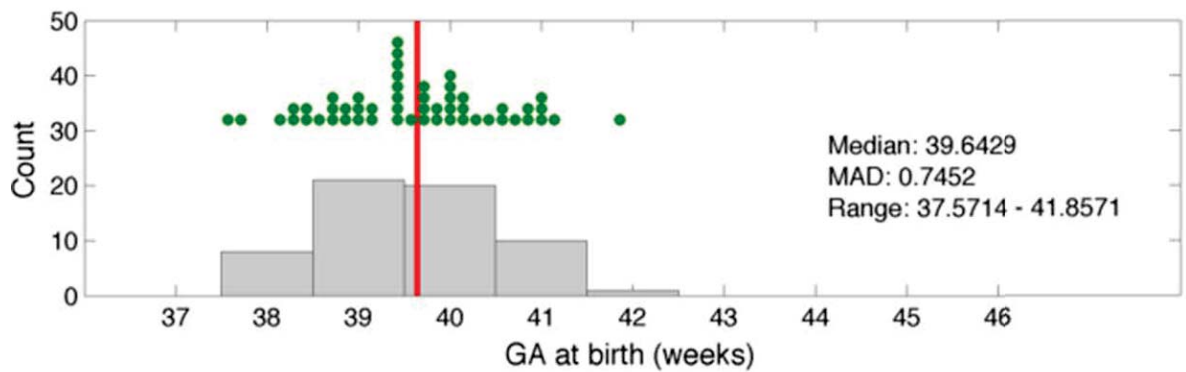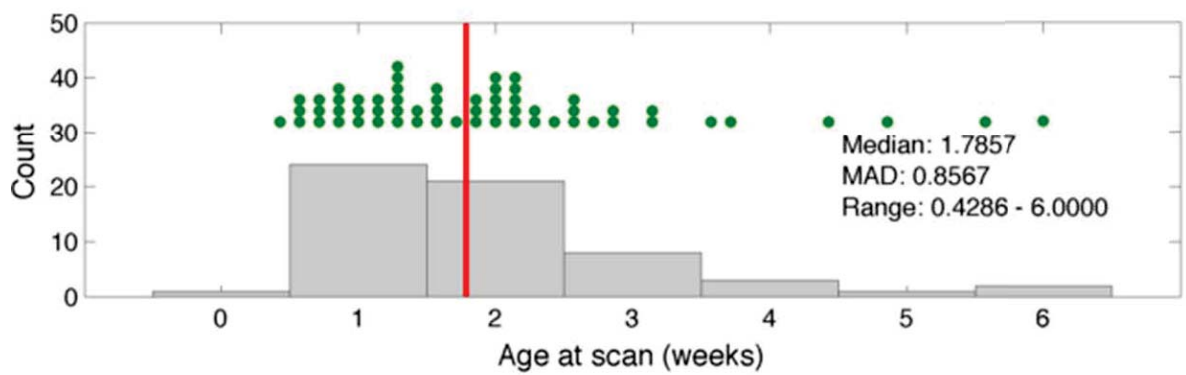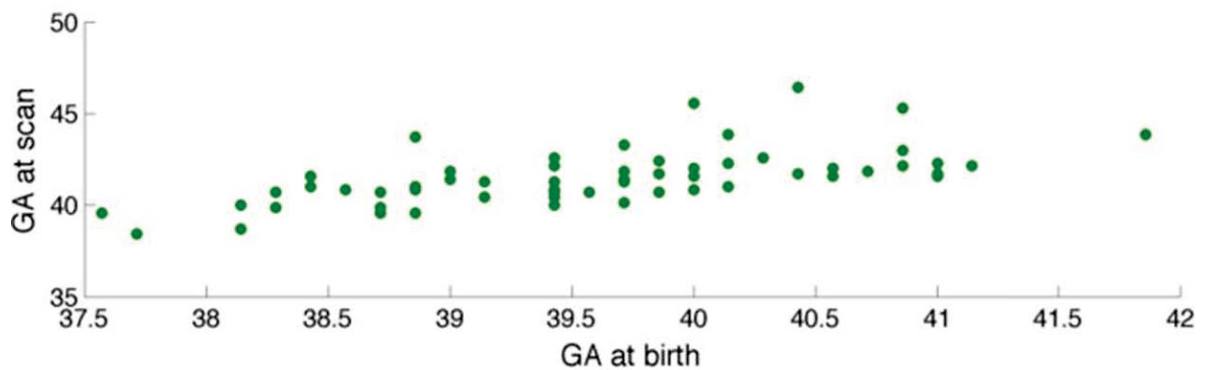

Figure S1

A.

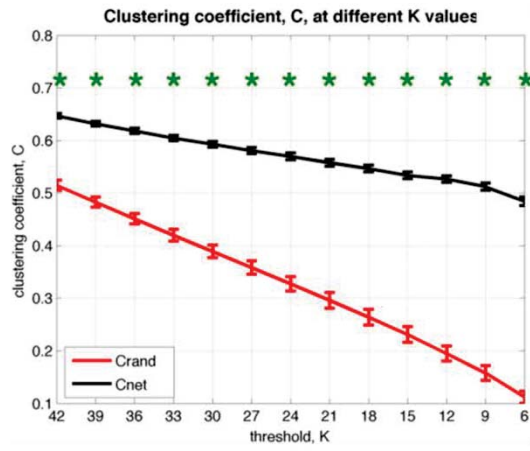

B.

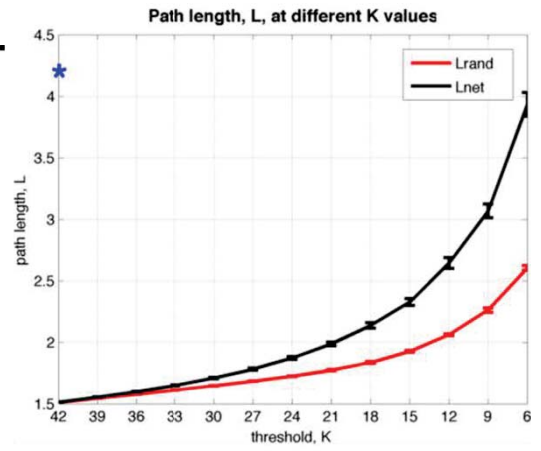

C.

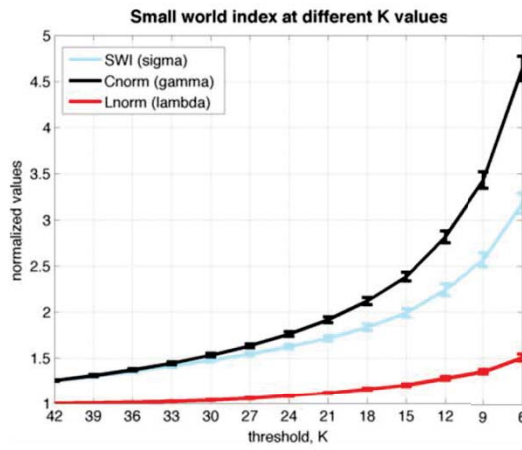

Figure S2

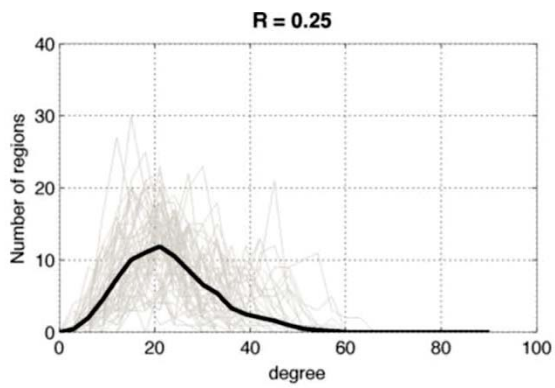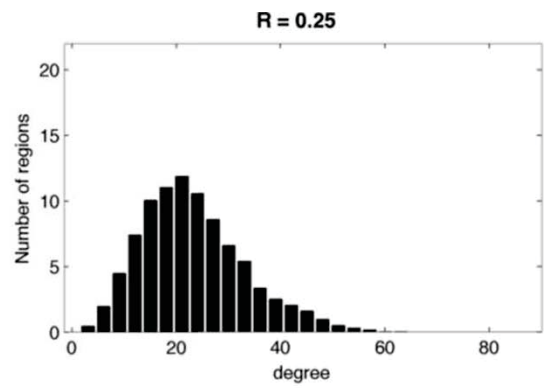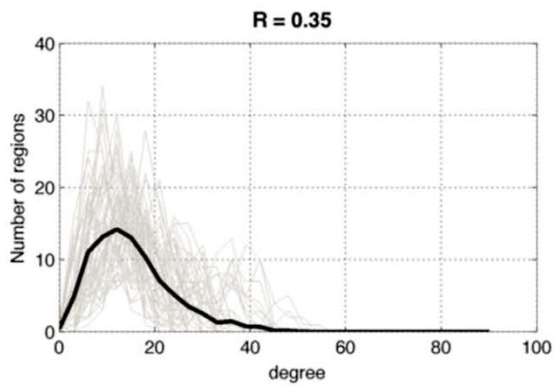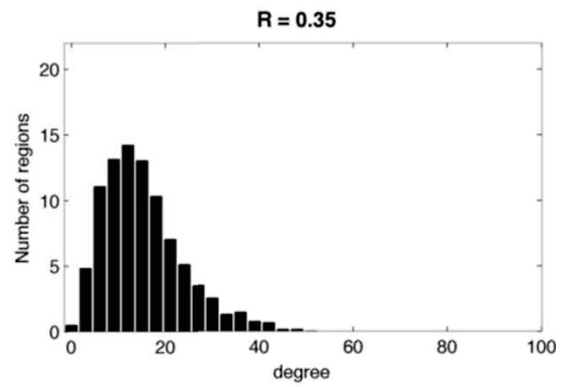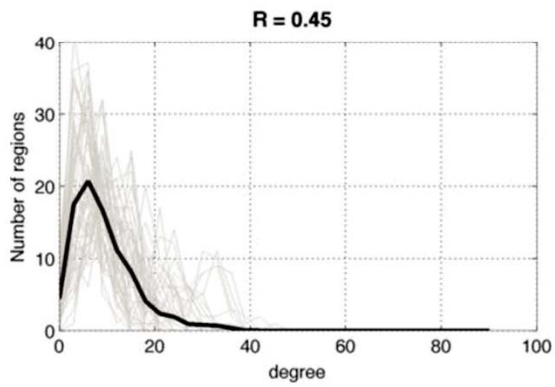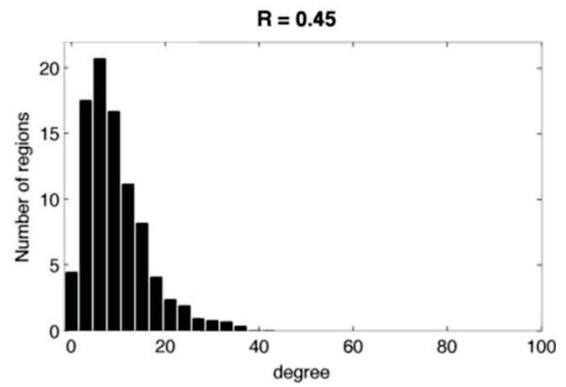

Figure S3

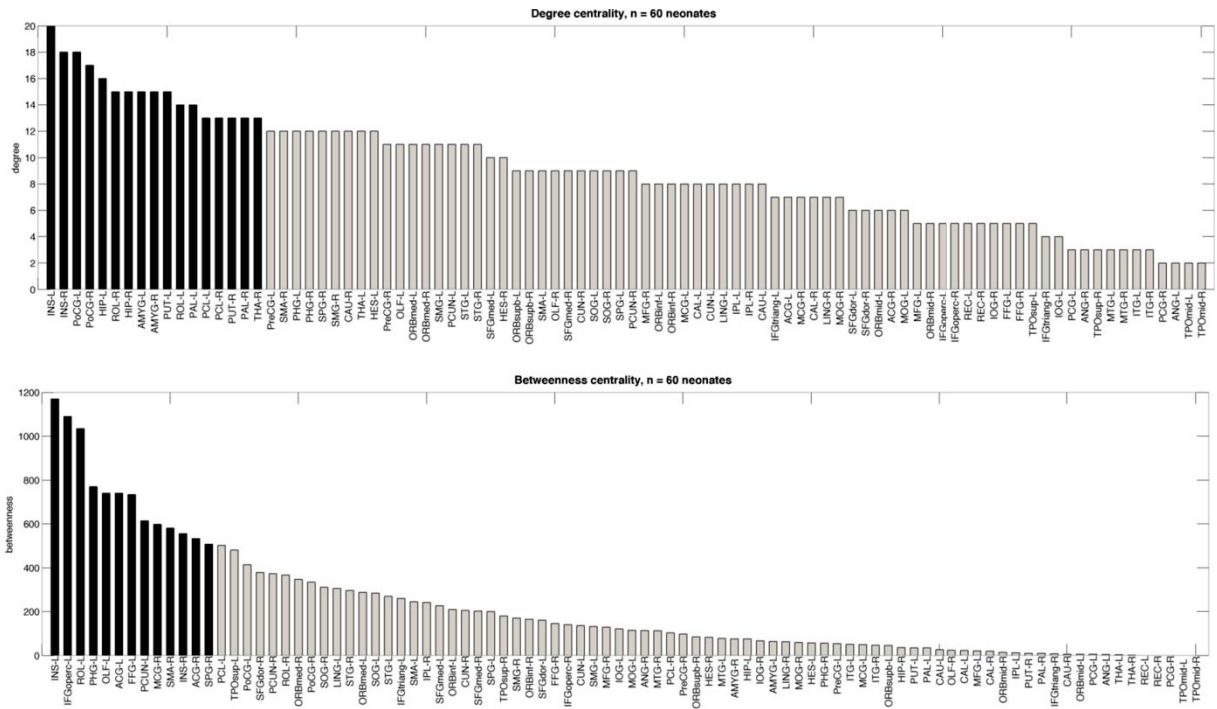

Figure S4

Figure S5

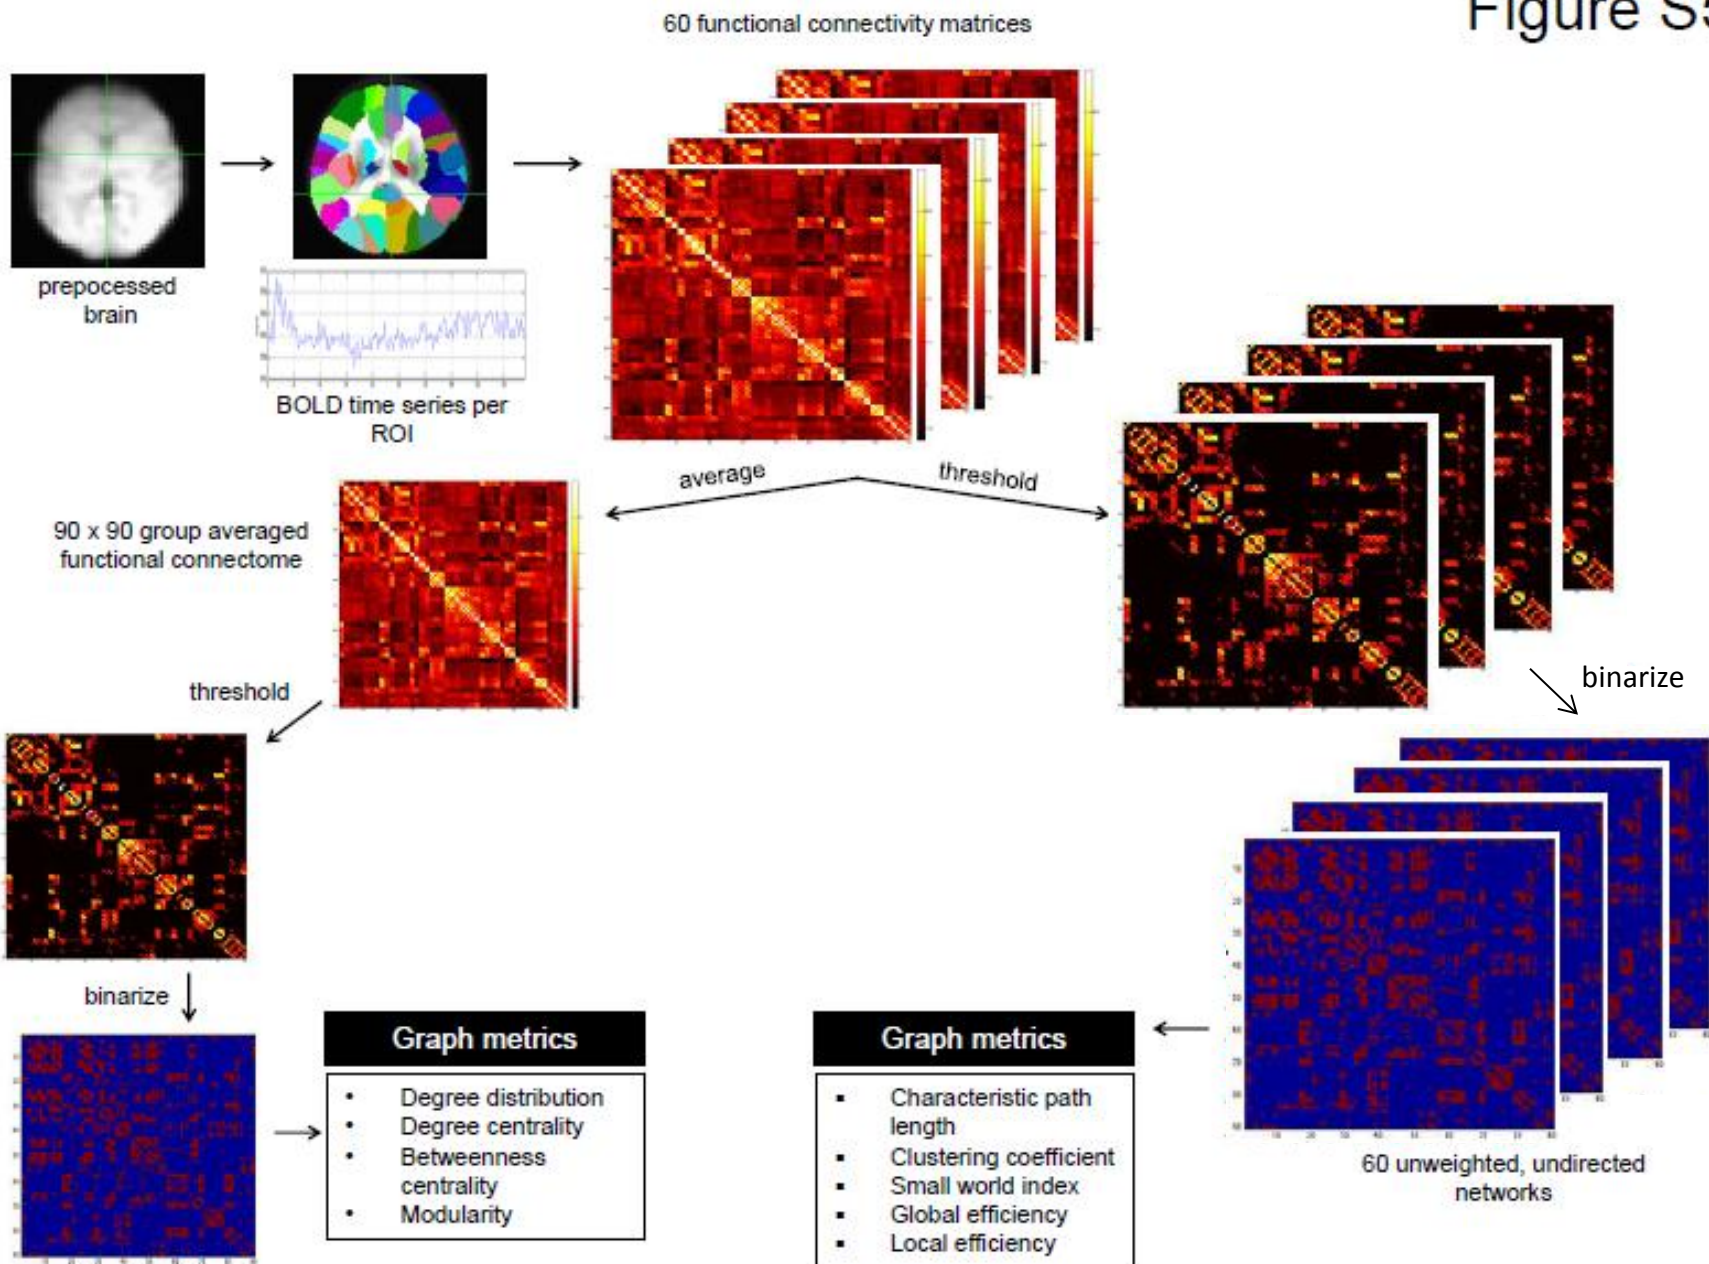

**TABLE S1.** Demographic data for 60 neonates.

|                            | Median $\pm$ MAD     | Range         |
|----------------------------|----------------------|---------------|
| <b>GA at birth (weeks)</b> | 39.64 $\pm$ 0.74     | 37.57 - 41.86 |
| <b>GA at scan (weeks)*</b> | 41.50 $\pm$ 1.07     | 38.43 - 46.43 |
| <b>Age at scan (days)</b>  | 12.50 $\pm$ 6.00     | 0.43 - 42.00  |
| <b>Birth weight (kg)**</b> | 3391.50 $\pm$ 261.47 | 2594 - 3968   |
| <b>Apgar 1</b>             | 8.00 $\pm$ 0.68      | 1 - 9         |
| <b>Apgar 5</b>             | 9.00 $\pm$ 0.25      | 5 - 9         |

\* All subjects, except for 3, are neonates (< 4 weeks old).

\*\* Birth weight not available for 2 infants.

\*\*\* Apgar scores not available for 14 infants.

**TABLE S2.** AIC values for degree distribution models

| Model                                    | AIC* Values     |                 |                 |
|------------------------------------------|-----------------|-----------------|-----------------|
|                                          | <i>R</i> = 0.25 | <i>R</i> = 0.35 | <i>R</i> = 0.45 |
| <b>Power law</b>                         | 780             | 628             | 466             |
| <b>Exponentially truncated power law</b> | 560             | 492             | 403             |
| <b>Exponential</b>                       | 639             | 544             | 453             |

\* AIC: Akaike Information Criterion



**TABLE S3.** Regions of interest (ROIs). Abbreviations used by Shi et al. (2011) were adopted.

| Region                              | Abbreviation | Region                   | Abbreviation |
|-------------------------------------|--------------|--------------------------|--------------|
| Precentral gyrus                    | PreCG        | Cuneus                   | CUN          |
| Superior frontal gyrus (dorsal)     | SFGdor       | Lingual gyrus            | LING         |
| Orbitofrontal cortex (superior)     | ORBsupb      | Superior occipital gyrus | SOG          |
| Middle frontal gyrus                | MFG          | Middle occipital gyrus   | MOG          |
| Orbitofrontal cortex (middle)       | ORBmid       | Inferior occipital gyrus | IOG          |
| Inferior frontal gyrus (opercular)  | IFGoperc     | Fusiform gyrus           | FFG          |
| Inferior frontal gyrus (triangular) | IFGtriang    | Postcentral gyrus        | PoCG         |
| Orbitofrontal cortex (inferior)     | ORBinf       | Superior parietal gyrus  | SPG          |
| Rolandic operculum                  | ROL          | Inferior parietal lobule | IPL          |
| Supplementary motor area            | SMA          | Supramarginal gyrus      | SMG          |
| Olfactory                           | OLF          | Angular gyrus            | ANG          |
| Superior frontal gyrus (medial)     | SFGmed       | Precuneus                | PCUN         |
| Orbitofrontal cortex (medial)       | ORBmed       | Paracentral lobule       | PCL          |
| Rectus gyrus                        | REC          | Caudate                  | CAU          |
| Insula                              | INS          | Putamen                  | PUT          |
| Anterior cingulate gyrus            | ACG          | Pallidum                 | PAL          |
| Middle cingulate gyrus              | MCG          | Thalamus                 | THA          |
| Posterior cingulate gyrus           | PCG          | Heschl gyrus             | HES          |
| Hippocampus                         | HIP          | Superior temporal gyrus  | STG          |
| Parahippocampal gyrus               | PHG          | Temporal pole (superior) | TPOsup       |
| Amygdala                            | AMYG         | Middle temporal gyrus    | MTG          |
| Calcarine cortex                    | CAL          | Temporal pole (middle)   | TPOmid       |
|                                     |              | Inferior temporal gyrus  | ITG          |

**TABLE S4.** Regions of interest within each module and their tissue classification\*.

| Module 1 | Class       | Module 2    | Class       | Module 3 | Class       | Module 4 | Class       |
|----------|-------------|-------------|-------------|----------|-------------|----------|-------------|
| PreCG-L  | primary     | SFGdor-L    | association | OLF-L    | limbic      | CAL-L    | primary     |
| PreCG-R  | primary     | SFGdor-R    | association | OLF-R    | limbic      | CAL-R    | primary     |
| ROL-L    | association | ORBsupb-L   | paralimbic  | INS-L    | paralimbic  | CUN-L    | association |
| ROL-R    | association | ORBsupb-R   | paralimbic  | INS-R    | paralimbic  | CUN-R    | association |
| SMA-L    | association | MFG-L       | association | HIP-L    | limbic      | LING-L   | association |
| SMA-R    | association | MFG-R       | association | HIP-R    | limbic      | LING-R   | association |
| MCG-L    | paralimbic  | ORBmid-L    | paralimbic  | PHG-L    | paralimbic  | SOG-L    | association |
| MCG-R    | paralimbic  | ORBmid-R    | paralimbic  | PHG-R    | paralimbic  | SOG-R    | association |
| PCG-L    | paralimbic  | IFGoperc-L  | association | AMYG-L   | limbic      | MOG-L    | association |
| PCG-R    | paralimbic  | IFGoperc-R  | association | AMYG-R   | limbic      | MOG-R    | association |
| PoCG-L   | primary     | IFGtriang-L | association | CAU-L    | subcortical | IOG-L    | association |
| PoCG-R   | primary     | IFGtriang-R | association | CAU-R    | subcortical | IOG-R    | association |
| SPG-L    | association | ORBinf-L    | paralimbic  | PUT-L    | subcortical | FFG-L    | association |
| SPG-R    | association | ORBinf-R    | paralimbic  | PUT-R    | subcortical | FFG-R    | association |
| IPL-L    | association | SFGmed-L    | association | PAL-L    | subcortical | ANG-L    | association |
| IPL-R    | association | SFGmed-R    | association | PAL-R    | subcortical | ANG-R    | association |
| SMG-L    | association | ORBmed-L    | paralimbic  | THA-L    | subcortical | MTG-L    | association |
| SMG-R    | association | ORBmed-R    | paralimbic  | THA-R    | subcortical | MTG-R    | association |
| PCUN-L   | association | REC-L       | paralimbic  |          |             | ITG-L    | association |
| PCUN-R   | association | REC-R       | paralimbic  |          |             | ITG-R    | association |
| PCL-L    | association | ACG-L       | paralimbic  |          |             |          |             |
| PCL-R    | association | ACG-R       | paralimbic  |          |             |          |             |
| HES-L    | primary     | TPOsup-L    | paralimbic  |          |             |          |             |
| HES-R    | primary     | TPOsup-R    | paralimbic  |          |             |          |             |
| STG-L    | association | TPOmid-L    | paralimbic  |          |             |          |             |
| STG-R    | association | TPOmid-R    | paralimbic  |          |             |          |             |

\*Tissue classification based on Mesulam (2000)

**TABLE S5. Study inclusion and exclusion criteria**

**Inclusion criteria**      Healthy pregnancies with normal fetal echocardiogram and ultrasonogram

**Exclusion criteria**    Dysmorphic features by antenatal ultrasound

Chromosomal abnormalities by amniocentesis

Presentation after 28 weeks gestation

Multiple gestations

Evidence of congenital infections
